# Supplementary material for: High Diversity of Medicinal Uses of Thai Legumes (Fabaceae) and Their Potential in Public Herbal Medicine
Source: MDPI journal article supplement (doi:10.3390/d14080588), 2022-07-23
Supplement: s1 [file s1]

## Supplementary Material

**Table S1.** Ethnic groups from 152 studies of traditional medicine in Thailand, produced between 1986– 2019.

| Name of ethnic groups | Number of use reports | Number of references |
|-----------------------|-----------------------|----------------------|
| Akha                  | 84                    | 6                    |
| Burmese Immigrant     | 6                     | 1                    |
| Hmong                 | 120                   | 14                   |
| H'tin                 | 17                    | 4                    |
| Kachin                | 4                     | 1                    |
| Karen                 | 906                   | 33                   |
| Kayah                 | 6                     | 1                    |
| Khamu                 | 32                    | 5                    |
| Kuoy                  | 7                     | 2                    |
| Lahu                  | 67                    | 8                    |
| Lawa                  | 30                    | 11                   |
| Lisu                  | 20                    | 4                    |
| Lua                   | 50                    | 4                    |
| Mien                  | 55                    | 7                    |
| Moken                 | 3                     | 1                    |
| Phu Tai               | 27                    | 2                    |
| Pwo                   | 246                   | 7                    |
| Sakai                 | 5                     | 1                    |
| Tai Lao               | 35                    | 1                    |
| Tai Lue               | 26                    | 4                    |
| Tai Yai               | 166                   | 9                    |
| Tai Yuan              | 274                   | 13                   |
| Thai                  | 3090                  | 70                   |
| Thai-Khmer            | 45                    | 2                    |
| Thai-Khorat           | 5                     | 1                    |
| unspecified           | 34                    | 2                    |
| Yakkul                | 26                    | 1                    |
| Yunnan Chinese        | 1                     | 1                    |

**Table S2** Genera of medicinal legume species in Thailand, derived from 152 primary sources produced between 1986–2019.

| Genus                | Number of species | Use reports | Total species in Thailand |
|----------------------|-------------------|-------------|---------------------------|
| <i>Crotalaria</i>    | 18                | 141         | 39                        |
| <i>Dalbergia</i>     | 16                | 133         | 33                        |
| <i>Senna</i>         | 11                | 752         | 17                        |
| <i>Phanera</i>       | 10                | 71          | 28                        |
| <i>Derris</i>        | 8                 | 78          | 15                        |
| <i>Flemingia</i>     | 8                 | 152         | 12                        |
| <i>Indigofera</i>    | 8                 | 55          | 24                        |
| <i>Millettia</i>     | 8                 | 62          | 21                        |
| <i>Albizia</i>       | 7                 | 212         | 12                        |
| <i>Bauhinia</i>      | 7                 | 48          | 23                        |
| <i>Senegalia</i>     | 7                 | 278         | 16                        |
| <i>Uraria</i>        | 6                 | 107         | 14                        |
| <i>Erythrina</i>     | 5                 | 65          | 6                         |
| <i>Cassia</i>        | 4                 | 239         | 9                         |
| <i>Mimosa</i>        | 4                 | 292         | 5                         |
| <i>Mucuna</i>        | 4                 | 43          | 17                        |
| <i>Phyllodium</i>    | 4                 | 119         | 6                         |
| <i>Spatholobus</i>   | 4                 | 65          | 4                         |
| <i>Biancaea</i>      | 3                 | 363         | 6                         |
| <i>Clitoria</i>      | 3                 | 79          | 6                         |
| <i>Dendrolobium</i>  | 3                 | 19          | 8                         |
| <i>Entada</i>        | 3                 | 56          | 4                         |
| <i>Grona</i>         | 3                 | 75          | 12                        |
| <i>Lysiphyllum</i>   | 3                 | 70          | 4                         |
| <i>Sesbania</i>      | 3                 | 52          | 6                         |
| <i>Tephrosia</i>     | 3                 | 13          | 5                         |
| <i>Abrus</i>         | 2                 | 53          | 6                         |
| <i>Adenanthera</i>   | 2                 | 77          | 2                         |
| <i>Aeschynomene</i>  | 2                 | 24          | 3                         |
| <i>Archidendron</i>  | 2                 | 67          | 9                         |
| <i>Butea</i>         | 2                 | 47          | 3                         |
| <i>Caesalpinia</i>   | 2                 | 29          | 3                         |
| <i>Cajanus</i>       | 2                 | 38          | 6                         |
| <i>Canavalia</i>     | 2                 | 6           | 7                         |
| <i>Christia</i>      | 2                 | 5           | 4                         |
| <i>Dunbaria</i>      | 2                 | 15          | 8                         |
| <i>Erythrophleum</i> | 2                 | 7           | 3                         |
| <i>Guilandina</i>    | 2                 | 42          | 4                         |
| <i>Huangtcia</i>     | 2                 | 27          | 3                         |
| <i>Parkia</i>        | 2                 | 38          | 5                         |
| <i>Peltophorum</i>   | 2                 | 21          | 3                         |
| <i>Phylacium</i>     | 2                 | 11          | 1                         |
| <i>Pterocarpus</i>   | 2                 | 83          | 3                         |
| <i>Pterolobium</i>   | 2                 | 11          | 5                         |
| <i>Pueraria</i>      | 2                 | 25          | 12                        |
| <i>Saraca</i>        | 2                 | 5           | 9                         |
| <i>Shuteria</i>      | 2                 | 6           | 3                         |
| <i>Sophora</i>       | 2                 | 10          | 6                         |
| <i>Vachellia</i>     | 2                 | 19          | 5                         |
| <i>Vigna</i>         | 2                 | 7           | 20                        |

| Genus                 | Number of species | Use reports | Total species in Thailand |
|-----------------------|-------------------|-------------|---------------------------|
| <i>Xylia</i>          | 2                 | 105         | 2                         |
| <i>Brachypterum</i>   | 2                 | 153         | 5                         |
| <i>Lasiobema</i>      | 1                 | 11          | 8                         |
| <i>Acrocarpus</i>     | 1                 | 4           | 1                         |
| <i>Adinobotrys</i>    | 1                 | 6           | 1                         |
| <i>Afzelia</i>        | 1                 | 86          | 7                         |
| <i>Aganope</i>        | 1                 | 2           | 3                         |
| <i>Akschindlium</i>   | 1                 | 7           | 1                         |
| <i>Alysicarpus</i>    | 1                 | 9           | 3                         |
| <i>Calliandra</i>     | 1                 | 2           | 4                         |
| <i>Centrosema</i>     | 1                 | 2           | 1                         |
| <i>Chamaecrista</i>   | 1                 | 2           | 4                         |
| <i>Cheniella</i>      | 1                 | 4           | 4                         |
| <i>Codariocalyx</i>   | 1                 | 10          | 2                         |
| <i>Cynometra</i>      | 1                 | 2           | 7                         |
| <i>Delonix</i>        | 1                 | 6           | 1                         |
| <i>Dialium</i>        | 1                 | 5           | 4                         |
| <i>Dumasia</i>        | 1                 | 4           | 11                        |
| <i>Eriosema</i>       | 1                 | 19          | 1                         |
| <i>Galactia</i>       | 1                 | 1           | 1                         |
| <i>Glycine</i>        | 1                 | 1           | 1                         |
| <i>Glycyrrhiza</i>    | 1                 | 5           | 2                         |
| <i>Hegnera</i>        | 1                 | 7           | 1                         |
| <i>Hultholia</i>      | 1                 | 19          | 1                         |
| <i>Lablab</i>         | 1                 | 9           | 1                         |
| <i>Leucaena</i>       | 1                 | 53          | 2                         |
| <i>Mezoneuron</i>     | 1                 | 1           | 1                         |
| <i>Moullava</i>       | 1                 | 33          | 1                         |
| <i>Neptunia</i>       | 1                 | 29          | 4                         |
| <i>Neustanthus</i>    | 1                 | 5           | 1                         |
| <i>Ototropis</i>      | 1                 | 1           | 1                         |
| <i>Pachyrhizus</i>    | 1                 | 1           | 2                         |
| <i>Piliostigma</i>    | 1                 | 10          | 1                         |
| <i>Pithecellobium</i> | 1                 | 12          | 7                         |
| <i>Pleurolobus</i>    | 1                 | 8           | 1                         |
| <i>Polhillides</i>    | 1                 | 31          | 2                         |
| <i>Pongamia</i>       | 1                 | 3           | 1                         |
| <i>Psophocarpus</i>   | 1                 | 19          | 1                         |
| <i>Rhynchosia</i>     | 1                 | 1           | 5                         |
| <i>Samanea</i>        | 1                 | 10          | 1                         |
| <i>Sigmoidala</i>     | 1                 | 4           | 1                         |
| <i>Sindora</i>        | 1                 | 33          | 4                         |
| <i>Sohmaea</i>        | 1                 | 2           | 3                         |
| <i>Tadehagi</i>       | 1                 | 124         | 2                         |
| <i>Tamarindus</i>     | 1                 | 205         | 1                         |
| <i>Teramnus</i>       | 1                 | 5           | 1                         |
| <i>Teyleria</i>       | 1                 | 3           | 3                         |
| <i>Zornia</i>         | 1                 | 1           | 1                         |
| <b>Total</b>          | 262               | 5387        | 262                       |

**Table S3** The Pearson correlation coefficient between number of medicinal legume genera and Thailand's legume genera.

|                  |                     | <b>Correlations</b> |                 |
|------------------|---------------------|---------------------|-----------------|
|                  |                     | Medicinal_Genera    | Thailand_Genera |
| Medicinal_Genera | Pearson Correlation | 1                   | .873**          |
|                  | Sig. (2-tailed)     |                     | .000            |
|                  | N                   | 98                  | 98              |
| Thailand_Genera  | Pearson Correlation | .873**              | 1               |
|                  | Sig. (2-tailed)     | .000                |                 |
|                  | N                   | 98                  | 98              |

\*\*. Correlation is significant at the 0.01 level (2-tailed).

**Table S4** Use reports and percentages of parts used of legume species with medicinal uses, from 152 primary data sources produced between 1986–2019.

| <b>Part used</b> | <b>Use reports</b> | <b>Percent</b> |
|------------------|--------------------|----------------|
| roots            | 1206               | 22.7           |
| stems            | 1056               | 19.9           |
| unspecified      | 1056               | 19.9           |
| leaves           | 920                | 17.3           |
| entire plant     | 720                | 13.5           |
| bark             | 559                | 10.5           |
| seeds            | 353                | 6.6            |
| infructescences  | 305                | 5.7            |
| inflorescences   | 178                | 3.3            |
| exudates         | 16                 | 0.3            |
| galls            | 6                  | 0.1            |

**Table S5** Use reports of preparation of legume species with medicinal uses, from 152 primary data sources produced between 1986–2019.

| Preparation                              | Number of use reports |
|------------------------------------------|-----------------------|
| decoction                                | 2001                  |
| none                                     | 144                   |
| grated with water                        | 96                    |
| pounded                                  | 84                    |
| cold infusion                            | 62                    |
| herbal liquor                            | 56                    |
| roasted and hot infusion                 | 32                    |
| herbal compress                          | 29                    |
| boiled                                   | 28                    |
| roasted                                  | 27                    |
| smashed                                  | 25                    |
| cooked                                   | 24                    |
| crushed                                  | 23                    |
| powdered                                 | 21                    |
| grinded                                  | 20                    |
| make a bolus                             | 14                    |
| squeezed                                 | 12                    |
| roasted and grinded                      | 11                    |
| hot infusion                             | 10                    |
| maceration                               | 10                    |
| make a balm                              | 10                    |
| dried and decoction                      | 9                     |
| grated with rice water                   | 9                     |
| cut in half                              | 8                     |
| pounded with oil                         | 7                     |
| roasted and cold infusion                | 6                     |
| crushed with liquor                      | 4                     |
| crushed with rice water                  | 4                     |
| dried and grinded                        | 4                     |
| make a cigarette                         | 4                     |
| make an infused oil                      | 4                     |
| roasted and grinded then hot infusion    | 4                     |
| cooked chicken soup                      | 3                     |
| crushed with a bit of salt               | 3                     |
| crushed with water                       | 3                     |
| soaked in rice water                     | 3                     |
| soaked in water                          | 3                     |
| burned and grinded                       | 2                     |
| concoction                               | 2                     |
| decoction and add the honey              | 2                     |
| decoction with brown sugar               | 2                     |
| dried and grinded then cold infusion     | 2                     |
| dried and grinded then hot infusion      | 2                     |
| grinded and mix with alum powder         | 2                     |
| grinded and mix with lime juice          | 2                     |
| grinded and mix with liquor or hot water | 2                     |
| make a shampoo                           | 2                     |
| mixed with honey                         | 2                     |
| oil extraction                           | 2                     |
| pounded and heated                       | 2                     |
| pounded with coconut oil                 | 2                     |

| Preparation                                           | Number of use reports |
|-------------------------------------------------------|-----------------------|
| preserved in sugar syrup                              | 2                     |
| roasted and decoction                                 | 2                     |
| roasted and grinded then cold infusion                | 2                     |
| smashed and cold infusion                             | 2                     |
| crushed with red lime                                 | 1                     |
| cut into small pieces                                 | 1                     |
| decoction with calcium carbonate                      | 1                     |
| dipped with salt                                      | 1                     |
| grated with liquor                                    | 1                     |
| grinded and cold infusion                             | 1                     |
| make a necklace                                       | 1                     |
| make a tea                                            | 1                     |
| make a toothpaste                                     | 1                     |
| mixed with alum and air-dry overnight                 | 1                     |
| mixed with cooked rice                                | 1                     |
| mixed with oil                                        | 1                     |
| mixed with other herbs                                | 1                     |
| pounded with oil and heated                           | 1                     |
| pounded with water                                    | 1                     |
| roasted and boiled                                    | 1                     |
| roasted and crushed                                   | 1                     |
| roasted and crushed with pig fat                      | 1                     |
| roasted and grinded then mixed with laxative medicine | 1                     |
| roasted and pounded                                   | 1                     |
| roasted and put in the cooked rice                    | 1                     |
| shaved                                                | 1                     |
| smashed and roasted then boiled with salt             | 1                     |
| soaked in honey for 3 months then grated with water   | 1                     |
| soaked in lime water                                  | 1                     |
| taken out an epicarp                                  | 1                     |

**Table S6** Use reports of routes of administration of legume species with medicinal uses, from 152 primary data sources produced between 1986–2019.

| Routes of administration                     | Number of use reports |
|----------------------------------------------|-----------------------|
| potion                                       | 1965                  |
| oral                                         | 227                   |
| poultice                                     | 197                   |
| bath                                         | 187                   |
| liniment                                     | 166                   |
| herbal steam                                 | 52                    |
| chew                                         | 37                    |
| lozenge                                      | 20                    |
| put a spell on                               | 19                    |
| hair wash                                    | 18                    |
| clean the wound                              | 14                    |
| potion/oral                                  | 10                    |
| eye drops                                    | 9                     |
| oral/potion                                  | 8                     |
| gargle                                       | 6                     |
| hair treatment                               | 6                     |
| face wash                                    | 5                     |
| hand soak and foot soak                      | 5                     |
| massage                                      | 4                     |
| smoking                                      | 4                     |
| foot bath                                    | 3                     |
| blow to the eye                              | 2                     |
| eye wash                                     | 2                     |
| potion/chew                                  | 2                     |
| put on the vagina                            | 2                     |
| remove dust from the eyes                    | 2                     |
| soak                                         | 2                     |
| step over                                    | 2                     |
| apply on the eye                             | 1                     |
| apply on the eyelid                          | 1                     |
| apply on the face                            | 1                     |
| blow locally                                 | 1                     |
| blow to the nose                             | 1                     |
| brush teeth                                  | 1                     |
| chew with betel nut                          | 1                     |
| drops                                        | 1                     |
| ear drops                                    | 1                     |
| eat with rice                                | 1                     |
| eat with slice lime                          | 1                     |
| foot soak                                    | 1                     |
| potion/put a spell on                        | 1                     |
| potion/sit over                              | 1                     |
| put on the neck                              | 1                     |
| put on the stomach and poultice with hot pot | 1                     |
| snuff                                        | 1                     |
| spray                                        | 1                     |
| wipe the eye                                 | 1                     |

**Table S7** Use values (UV) of Thai medicinal legumes mentioned in 152 primary sources produced between 1986–2019.

| Ranks | Species name                                                                            | UV   |
|-------|-----------------------------------------------------------------------------------------|------|
| 1     | <i>*Biancaea sappan</i> (L.) Tod.                                                       | 1.30 |
| 2     | <i>Mimosa pudica</i> L.                                                                 | 1.14 |
| 3     | <i>*Senna siamea</i> (Lam.) H.S.Irwin & Barneby                                         | 0.93 |
| 4     | <i>*Senegalia rugata</i> (Lam.) Britton & Rose                                          | 0.91 |
| 5     | <i>*Tamarindus indica</i> L.                                                            | 0.78 |
| 6     | <i>*Senna alata</i> (L.) Roxb.                                                          | 0.73 |
| 7     | <i>*Cassia fistula</i> L.                                                               | 0.72 |
| 8     | <i>*Brachypterum scandens</i> (Roxb.) Miq.                                              | 0.48 |
| 9     | <i>Senna tora</i> (L.) Roxb.                                                            | 0.48 |
| 10    | <i>Tadehagi triquetrum</i> (L.) H.Ohashi                                                | 0.46 |
| 11    | <i>*Albizia myriophylla</i> Benth.                                                      | 0.44 |
| 12    | <i>*Senna garrettiana</i> (Craib) H.S.Irwin & Barneby                                   | 0.33 |
| 13    | <i>Clitoria ternatea</i> L.                                                             | 0.32 |
| 13    | <i>Pterocarpus macrocarpus</i> Kurz                                                     | 0.32 |
| 14    | <i>Senna occidentalis</i> (L.) Link                                                     | 0.29 |
| 15    | <i>Lysiphyllum strychnifolium</i> (Craib) A.Schmitz                                     | 0.28 |
| 16    | <i>Azelia xylocarpa</i> (Kurz) Craib                                                    | 0.27 |
| 16    | <i>Spatholobus parviflorus</i> (Roxb. ex G.Don) Kuntze                                  | 0.27 |
| 16    | <i>Leucaena leucocephala</i> (Lam.) de Wit                                              | 0.27 |
| 17    | <i>Adenanthera pavonina</i> L.                                                          | 0.25 |
| 17    | <i>Phyllodium pulchellum</i> (L.) Desv.                                                 | 0.25 |
| 17    | <i>Xylia xylocarpa</i> (Roxb.) W.Theob.                                                 | 0.25 |
| 17    | <i>Archidendron clypearia</i> (Jack) I.C.Nielsen                                        | 0.25 |
| 17    | <i>Uraria oblonga</i> (Wall. ex Benth.) H.Ohashi & K.Ohashi                             | 0.25 |
| 18    | <i>Derris elliptica</i> (Wall.) Benth.                                                  | 0.24 |
| 19    | <i>Phyllodium longipes</i> (Craib) Schindl.                                             | 0.23 |
| 20    | <i>Abrus precatorius</i> L.                                                             | 0.22 |
| 21    | <i>*Erythrina subumbrans</i> (Hassk.) Merr.                                             | 0.20 |
| 21    | <i>Sindora siamensis</i> Teijsm. ex Miq.                                                | 0.20 |
| 22    | <i>Butea superba</i> Roxb. ex Willd.                                                    | 0.18 |
| 22    | <i>Sesbania grandiflora</i> (L.) Poir.                                                  | 0.18 |
| 22    | <i>Xylia xylocarpa</i> (Roxb.) W.Theob. var. <i>kerrii</i> (Craib & Hutch.) I.C.Nielsen | 0.18 |
| 23    | <i>Grona heterocarpos</i> (L.) H.Ohashi & K.Ohashi                                      | 0.17 |
| 24    | <i>Albizia procera</i> (Roxb.) Benth.                                                   | 0.16 |
| 24    | <i>Cajanus cajan</i> (L.) Huth                                                          | 0.16 |
| 24    | <i>Entada rheedei</i> Spreng.                                                           | 0.16 |
| 24    | <i>Mucuna pruriens</i> (L.) DC.                                                         | 0.16 |
| 25    | <i>Albizia lebbeck</i> (L.) Benth.                                                      | 0.14 |
| 25    | <i>Uraria crinita</i> (L.) Desv. ex DC.                                                 | 0.14 |
| 26    | <i>Crotalaria pallida</i> Aiton                                                         | 0.13 |
| 27    | <i>Caesalpinia pulcherrima</i> (L.) Sw.                                                 | 0.12 |
| 27    | <i>Flemingia macrophylla</i> (Willd.) Kuntze ex Merr.                                   | 0.12 |
| 28    | <i>Dalbergia cultrata</i> T.S.Ralph                                                     | 0.11 |
| 28    | <i>Flemingia strobilifera</i> (L.) W.T.Aiton                                            | 0.11 |
| 28    | <i>Polhillides velutina</i> (Willd.) H.Ohashi & K.Ohashi                                | 0.11 |
| 28    | <i>*Senegalia catechu</i> (L.f.) P.J.H.Hurter & Mabb.                                   | 0.11 |
| 29    | <i>Flemingia stricta</i> Roxb.                                                          | 0.10 |
| 29    | <i>Grona triflora</i> (L.) H.Ohashi & K.Ohashi                                          | 0.10 |
| 29    | <i>Guilandina bonduc</i> L.                                                             | 0.10 |
| 29    | <i>Huangtcia renifolia</i> (L.) H.Ohashi & K.Ohashi                                     | 0.10 |
| 29    | <i>Millettia caerulea</i> Baker                                                         | 0.10 |
| 29    | <i>Neptunia prostrata</i> (Lam.) Baill.                                                 | 0.10 |

| Ranks | Species name                                                         | UV   |
|-------|----------------------------------------------------------------------|------|
| 29    | <i>Bauhinia acuminata</i> L.                                         | 0.10 |
| 29    | <i>Bauhinia purpurea</i> L.                                          | 0.10 |
| 29    | <i>Flemingia lineata</i> (L.) Roxb. ex W.T.Aiton                     | 0.10 |
| 29    | <i>Hultholia mimosoides</i> (Lam.) Gagnon & G.P.Lewis                | 0.10 |
| 29    | <i>Moullava digyna</i> (Rottler) Gagnon & G.P.Lewis                  | 0.10 |
| 29    | <i>Senna hirsuta</i> (L.) H.S.Irwin & Barneby                        | 0.10 |
| 30    | <i>Crotalaria alata</i> Buch.-Ham. ex D.Don                          | 0.09 |
| 30    | <i>Dalbergia stipulacea</i> Roxb.                                    | 0.09 |
| 30    | <i>Parkia speciosa</i> Hassk.                                        | 0.09 |
| 30    | <i>Phanera bracteata</i> Benth.                                      | 0.09 |
| 30    | <i>Pueraria mirifica</i> Airy Shaw & Suvat.                          | 0.09 |
| 30    | <i>Senegalia megaladena</i> (Desv.) Maslin, Seigler & Ebinger        | 0.09 |
| 31    | <i>Indigofera hendecaphylla</i> Jacq.                                | 0.08 |
| 31    | <i>Millettia extensa</i> (Benth.) Benth. ex Baker                    | 0.08 |
| 31    | <i>Psophocarpus tetragonolobus</i> (L.) DC.                          | 0.08 |
| 31    | <i>Archidendron jiringa</i> (Jack) I.C.Nielsen                       | 0.08 |
| 31    | <i>Cassia bakeriana</i> Craib                                        | 0.08 |
| 31    | <i>Dunbaria bella</i> Prain                                          | 0.08 |
| 31    | <i>Pterocarpus indicus</i> Willd.                                    | 0.08 |
| 31    | <i>Senegalia pennata</i> (L.) Maslin                                 | 0.08 |
| 31    | <i>Senna timoriensis</i> (DC.) H.S.Irwin & Barneby                   | 0.08 |
| 32    | <i>Peltophorum dasyrhachis</i> (Miq.) Kurz                           | 0.07 |
| 32    | <i>Senna sophera</i> (L.) Roxb.                                      | 0.07 |
| 32    | <i>Entada glandulosa</i> Pierre ex Gagnep.                           | 0.07 |
| 32    | <i>Erythrina stricta</i> Roxb.                                       | 0.07 |
| 32    | <i>Flemingia paniculata</i> Wall. ex Benth.                          | 0.07 |
| 32    | <i>Indigofera tinctoria</i> L.                                       | 0.07 |
| 32    | <i>Lasiobema penicillilobum</i> (Pierre ex Gagnep.) A.Schmitz        | 0.07 |
| 32    | <i>Mucuna macrocarpa</i> Wall.                                       | 0.07 |
| 32    | <i>Phanera scandens</i> (L.) Lour. ex Raf.                           | 0.07 |
| 33    | <i>Butea monosperma</i> (Lam.) Kuntze                                | 0.06 |
| 33    | <i>Crotalaria assamica</i> Benth.                                    | 0.06 |
| 33    | <i>Dalbergia oliveri</i> Gamble ex Prain                             | 0.06 |
| 33    | <i>Dendrolobium lanceolatum</i> (Dunn) Schindl.                      | 0.06 |
| 33    | <i>Indigofera caloneura</i> Kurz                                     | 0.06 |
| 33    | <i>Mimosa diplotricha</i> C.Wright                                   | 0.06 |
| 33    | <i>Piliostigma malabaricum</i> (Roxb.)                               | 0.06 |
| 33    | <i>Pithecellobium dulce</i> (Roxb.) Benth.                           | 0.06 |
| 34    | <i>Aeschynomene americana</i> L.                                     | 0.05 |
| 34    | <i>Albizia chinensis</i> (Osbeck) Merr.                              | 0.05 |
| 34    | <i>Cassia javanica</i> L.                                            | 0.05 |
| 34    | <i>Dalbergia cochinchinensis</i> Pierre                              | 0.05 |
| 34    | <i>Dalbergia parviflora</i> Roxb.                                    | 0.05 |
| 34    | <i>Eriosema chinense</i> Vogel                                       | 0.05 |
| 34    | <i>Flemingia sootepensis</i> Craib                                   | 0.05 |
| 34    | <i>Lablab purpureus</i> (L.) Sweet                                   | 0.05 |
| 34    | <i>Pleurolobus gangeticus</i> (L.) J.St.-Hil. ex H.Ohashi & K.Ohashi | 0.05 |
| 34    | <i>Senna surattensis</i> (Burm.f.) H.S.Irwin & Barneby               | 0.05 |
| 34    | <i>Vachellia farnesiana</i> (L.) Wight & Arn.                        | 0.05 |
| 34    | <i>Codariocalyx motorius</i> (Houtt.) H.Ohashi                       | 0.05 |
| 34    | <i>Crotalaria albida</i> B.Heyne ex Roth                             | 0.05 |
| 34    | <i>Crotalaria bracteata</i> Roxb. ex DC.                             | 0.05 |
| 34    | <i>Crotalaria spectabilis</i> Roth                                   | 0.05 |
| 34    | <i>Grona styracifolia</i> (Osbeck) H.Ohashi & K.Ohashi               | 0.05 |
| 34    | <i>Phylacium bracteosum</i> Benn.                                    | 0.05 |
| 34    | <i>Phyllodium vestitum</i> Benth.                                    | 0.05 |

| Ranks | Species name                                                                                  | UV   |
|-------|-----------------------------------------------------------------------------------------------|------|
| 34    | <i>Pterolobium macropterum</i> Kurz                                                           | 0.05 |
| 34    | <i>Samanea saman</i> (Jacq.) Merr.                                                            | 0.05 |
| 34    | <i>Spatholobus harmandii</i> Gagnep.                                                          | 0.05 |
| 35    | <i>Abrus melanospermus</i> Hassk.                                                             | 0.04 |
| 35    | <i>Akschindlium godefroyanum</i> (Kuntze) H.Ohashi                                            | 0.04 |
| 35    | <i>Albizia lebbekoides</i> (DC.) Benth.                                                       | 0.04 |
| 35    | <i>Crotalaria lejoloba</i> Bartl.                                                             | 0.04 |
| 35    | <i>Dalbergia nigrescens</i> Kurz                                                              | 0.04 |
| 35    | <i>Delonix regia</i> (Bojer ex Hook.) Raf.                                                    | 0.04 |
| 35    | <i>Dendrolobium thorelii</i> (Gagnep.) Schindl.                                               | 0.04 |
| 35    | <i>Derris trifoliata</i> Lour.                                                                | 0.04 |
| 35    | <i>Erythrina suberosa</i> Roxb.                                                               | 0.04 |
| 35    | <i>Flemingia semialata</i> Roxb. ex W.T.Aiton                                                 | 0.04 |
| 35    | <i>Millettia brandisiana</i> Kurz                                                             | 0.04 |
| 35    | <i>Phanera ornata</i> var. <i>kerrii</i> (Gagnep.) Bandyop., Ghoshal & M.K.Pathak             | 0.04 |
| 35    | <i>Senegalia megaladena</i> var. <i>indochinensis</i> (I.C.Nielsen) Maslin, Seigler & Ebinger | 0.04 |
| 35    | <i>Tephrosia purpurea</i> (L.) Pers.                                                          | 0.04 |
| 35    | <i>Uraria lagopodioides</i> (L.) DC.                                                          | 0.04 |
| 36    | <i>Alysicarpus vaginalis</i> (L.) DC.                                                         | 0.03 |
| 36    | <i>Caesalpinia crista</i> L.                                                                  | 0.03 |
| 36    | <i>Canavalia gladiata</i> (Jacq.) DC.                                                         | 0.03 |
| 36    | <i>Crotalaria verrucosa</i> L.                                                                | 0.03 |
| 36    | <i>Dalbergia ovata</i> Graham ex Benth.                                                       | 0.03 |
| 36    | <i>Dialium cochinchinense</i> Pierre                                                          | 0.03 |
| 36    | <i>Entada spiralis</i> Ridl.                                                                  | 0.03 |
| 36    | <i>Erythrina fusca</i> Lour.                                                                  | 0.03 |
| 36    | <i>Erythrophleum succirubrum</i> Gagnep.                                                      | 0.03 |
| 36    | <i>Mimosa pigra</i> L.                                                                        | 0.03 |
| 36    | <i>Neustanthus phaseoloides</i> (Roxb.) Benth.                                                | 0.03 |
| 36    | <i>Parkia timoriana</i> (DC.) Merr.                                                           | 0.03 |
| 36    | <i>Peltophorum pterocarpum</i> (DC.) Backer ex K.Heyne                                        | 0.03 |
| 36    | * <i>Senna alexandrina</i> Mill.                                                              | 0.03 |
| 36    | <i>Sophora exigua</i> Craib                                                                   | 0.03 |
| 36    | <i>Teramnus labialis</i> (L.f.) Spreng.                                                       | 0.03 |
| 36    | <i>Acrocarpus fraxinifolius</i> Wight & Arn.                                                  | 0.03 |
| 36    | <i>Cajanus goensis</i> Dalzell                                                                | 0.03 |
| 36    | <i>Cheniella glauca</i> (Benth.) R.Clark & Mackinder                                          | 0.03 |
| 36    | <i>Crotalaria pallida</i> Aiton var. <i>obovata</i> (G.Don) Polhill                           | 0.03 |
| 36    | <i>Dalbergia candenatensis</i> (Dennst.) Prain                                                | 0.03 |
| 36    | <i>Dalbergia velutina</i> Benth.                                                              | 0.03 |
| 36    | <i>Derris elegans</i> Benth.                                                                  | 0.03 |
| 36    | <i>Dumasia leiocarpa</i> Benth.                                                               | 0.03 |
| 36    | * <i>Glycyrrhiza glabra</i> L.                                                                | 0.03 |
| 36    | <i>Hegnera obcordata</i> (Miq.) Schindl.                                                      | 0.03 |
| 36    | <i>Phanera sirindhorniae</i> (K.Larsen & S.S.Larsen) Mackinder & R.Clark                      | 0.03 |
| 36    | <i>Pueraria candollei</i> Wall. ex Benth.                                                     | 0.03 |
| 36    | <i>Senegalia caesia</i> (L.) Maslin, Seigler & Ebinger                                        | 0.03 |
| 36    | <i>Senegalia comosa</i> (Gagnep.) Maslin, Seigler & Ebinger                                   | 0.03 |
| 36    | <i>Vigna unguiculata</i> (L.) Walp.                                                           | 0.03 |
| 37    | <i>Albizia odoratissima</i> (L.f.) Benth.                                                     | 0.02 |
| 37    | <i>Bauhinia saccocalyx</i> Pierre                                                             | 0.02 |
| 37    | <i>Bauhinia viridescens</i> Desv.                                                             | 0.02 |
| 37    | <i>Clitoria macrophylla</i> Wall. ex Benth.                                                   | 0.02 |

| Ranks | Species name                                                                                       | UV   |
|-------|----------------------------------------------------------------------------------------------------|------|
| 37    | <i>Crotalaria medicaginea</i> Lam.                                                                 | 0.02 |
| 37    | <i>Crotalaria sessiliflora</i> L.                                                                  | 0.02 |
| 37    | <i>Dalbergia cana</i> Graham ex Kurz                                                               | 0.02 |
| 37    | <i>Dalbergia lanceolaria</i> L.f.                                                                  | 0.02 |
| 37    | <i>Dendrolobium triangulare</i> (Retz.) Schindl.                                                   | 0.02 |
| 37    | <i>Derris reticulata</i> Craib                                                                     | 0.02 |
| 37    | <i>Guilandina major</i> (Medik.) Small                                                             | 0.02 |
| 37    | <i>Millettia pachycarpa</i> Benth.                                                                 | 0.02 |
| 37    | <i>Mucuna revoluta</i> Wilmot-Dear                                                                 | 0.02 |
| 37    | <i>Phanera pulla</i> (Craib) Sinou & Bruneau                                                       | 0.02 |
| 37    | <i>Pongamia pinnata</i> (L.) Pierre                                                                | 0.02 |
| 37    | <i>Pterolobium integrum</i> Craib                                                                  | 0.02 |
| 37    | <i>Saraca declinata</i> (Jack) Miq.                                                                | 0.02 |
| 37    | <i>Shutteria involucrata</i> (Wall.) Wight & Arn. ex Walp.                                         | 0.02 |
| 37    | <i>Sigmoidala kityana</i> (Craib) J.Compton & Schrire                                              | 0.02 |
| 37    | <i>Teyleria stricta</i> (Kurz) A.N.Egan & B.Pan                                                    | 0.02 |
| 38    | <i>Adenanthera microsperma</i> Teijsm. & Binn.                                                     | 0.01 |
| 38    | <i>Adinobotrys atropurpureus</i> (Wall.) Dunn                                                      | 0.01 |
| 38    | <i>Aganope thyrsiflora</i> (Benth.) Polhill                                                        | 0.01 |
| 38    | <i>Albizia lucidior</i> (Steud.) I.C.Nielson ex H.Hara                                             | 0.01 |
| 38    | <i>Bauhinia monandra</i> Kurz                                                                      | 0.01 |
| 38    | <i>Bauhinia variegata</i> L.                                                                       | 0.01 |
| 38    | <i>Biancaea decapetala</i> (Roth) O.Deg.                                                           | 0.01 |
| 38    | <i>Cassia grandis</i> L.f.                                                                         | 0.01 |
| 38    | <i>Centrosema pubescens</i> Benth.                                                                 | 0.01 |
| 38    | <i>Chamaecrista pumila</i> (Lam.) K.Larsen                                                         | 0.01 |
| 38    | <i>Christia obcordata</i> (Poir.) Bakh.f.                                                          | 0.01 |
| 38    | <i>Christia vespertilionis</i> (L.f.) Bakh.f.                                                      | 0.01 |
| 38    | <i>Crotalaria kurzii</i> Baker ex Kurz                                                             | 0.01 |
| 38    | <i>Crotalaria quinquefolia</i> L.                                                                  | 0.01 |
| 38    | <i>Cynometra cauliflora</i> L.                                                                     | 0.01 |
| 38    | <i>Dalbergia foliacea</i> Wall. ex Benth.                                                          | 0.01 |
| 38    | <i>Dalbergia glomeriflora</i> Kurz                                                                 | 0.01 |
| 38    | <i>Dalbergia lanceolaria</i> subsp. <i>paniculata</i> (Roxb.) Thoth.                               | 0.01 |
| 38    | <i>Dalbergia tsoi</i> Merr. & Chun                                                                 | 0.01 |
| 38    | <i>Dunbaria punctata</i> (Wight & Arn.) Benth.                                                     | 0.01 |
| 38    | <i>Erythrophleum teysmannii</i> (Kurz) Craib                                                       | 0.01 |
| 38    | <i>Indigofera galegoides</i> DC.                                                                   | 0.01 |
| 38    | <i>Indigofera suffruticosa</i> Mill.                                                               | 0.01 |
| 38    | <i>Lysiphyllum binatum</i> (Blanco) de Wit                                                         | 0.01 |
| 38    | <i>Lysiphyllum winitii</i> (Craib) de Wit                                                          | 0.01 |
| 38    | <i>Millettia leucantha</i> Kurz                                                                    | 0.01 |
| 38    | <i>Mucuna bracteata</i> DC. ex Kurz                                                                | 0.01 |
| 38    | <i>Phanera harmsiana</i> (Hosseus) Bandyop. & Ghoshal                                              | 0.01 |
| 38    | <i>Phanera involuclata</i> (Kurz) de Wit                                                           | 0.01 |
| 38    | <i>Phanera nervosa</i> Benth.                                                                      | 0.01 |
| 38    | <i>Phanera ornata</i> var. <i>burmanica</i> (K.Larsen & S.S.Larsen) Bandyop., Ghoshal & M.K.Pathak | 0.01 |
| 38    | <i>Phylacium majus</i> Collett & Hemsl.                                                            | 0.01 |
| 38    | <i>Saraca indica</i> L.                                                                            | 0.01 |
| 38    | <i>Sesbania sesban</i> (L.) Merr.                                                                  | 0.01 |
| 38    | <i>Sophora flavescens</i> Aiton                                                                    | 0.01 |
| 38    | <i>Spatholobus pottingeri</i> Prain                                                                | 0.01 |
| 38    | <i>Spatholobus suberectus</i> Dunn                                                                 | 0.01 |
| 38    | <i>Tephrosia coccinea</i> Wall.                                                                    | 0.01 |
| 38    | <i>Vachellia harmandiana</i> (Pierre) Maslin, Seigler & Ebinger                                    | 0.01 |

| Ranks | Species name                                                                   | UV   |
|-------|--------------------------------------------------------------------------------|------|
| 38    | <i>Aeschynomene indica</i> L.                                                  | 0.01 |
| 38    | <i>Bauhinia pottsii</i> G.Don                                                  | 0.01 |
| 38    | <i>Biancaea godefroyana</i> (Kuntze) Molinari & Mayta                          | 0.01 |
| 38    | <i>Brachypterum eriocarpum</i> (F.C.How) Adema & Sirich.                       | 0.01 |
| 38    | <i>Calliandra haematocephala</i> Hassk.                                        | 0.01 |
| 38    | <i>Canavalia cathartica</i> Thouars                                            | 0.01 |
| 38    | <i>Clitoria chanondii</i> Chuakul                                              | 0.01 |
| 38    | <i>Crotalaria calycina</i> Schrank                                             | 0.01 |
| 38    | <i>Crotalaria cytisoides</i> Roxb. ex DC.                                      | 0.01 |
| 38    | <i>Crotalaria dubia</i> Benth.                                                 | 0.01 |
| 38    | <i>Crotalaria montana</i> B.Heyne ex Roth                                      | 0.01 |
| 38    | <i>Crotalaria retusa</i> L.                                                    | 0.01 |
| 38    | <i>Dalbergia retusa</i> Hemsl.                                                 | 0.01 |
| 38    | <i>Derris ferruginea</i> (Wall. ex Voigt) Benth.                               | 0.01 |
| 38    | <i>Derris montana</i> Benth.                                                   | 0.01 |
| 38    | <i>Derris thorelii</i> (Gagnep.) Craib                                         | 0.01 |
| 38    | <i>Derris tonkinensis</i> Gagnep.                                              | 0.01 |
| 38    | <i>Erythrina variegata</i> L.                                                  | 0.01 |
| 38    | <i>Flemingia ferruginea</i> Wall. ex Benth.                                    | 0.01 |
| 38    | <i>Galactia striata</i> (Jacq.) Urb. var. <i>villosa</i> (Wight & Arn.) Verdc. | 0.01 |
| 38    | <i>Glycine max</i> (L.) Merr.                                                  | 0.01 |
| 38    | <i>Huangticia oblata</i> (Baker ex Kurz) H.Ohashi & K.Ohashi                   | 0.01 |
| 38    | <i>Indigofera hirsuta</i> L.                                                   | 0.01 |
| 38    | <i>Indigofera sootepensis</i> Craib                                            | 0.01 |
| 38    | <i>Indigofera squalida</i> Prain                                               | 0.01 |
| 38    | <i>Mezoneuron hymenocarpum</i> Wight & Arn. ex Prain                           | 0.01 |
| 38    | <i>Millettia glaucescens</i> Kurz                                              | 0.01 |
| 38    | <i>Millettia kangensis</i> Craib                                               | 0.01 |
| 38    | <i>Millettia rigens</i> (Craib) Niyomdham                                      | 0.01 |
| 38    | <i>Mimosa pudica</i> var. <i>unijuga</i> (Duchass. & Walp.) Griseb.            | 0.01 |
| 38    | <i>Ototropis multiflora</i> (DC.) H.Ohashi & K.Ohashi                          | 0.01 |
| 38    | <i>Pachyrhizus erosus</i> (L.) Urb.                                            | 0.01 |
| 38    | <i>Phanera ornata</i> (Kurz) Thoth.                                            | 0.01 |
| 38    | <i>Phyllodium elegans</i> (Lour.) Desv.                                        | 0.01 |
| 38    | <i>Rhynchosia avensis</i> Benth. ex Baker                                      | 0.01 |
| 38    | <i>Senna spectabilis</i> (DC.) H.S.Irwin & Barneby                             | 0.01 |
| 38    | <i>Sesbania aculeata</i> (Schreb.) Pers.                                       | 0.01 |
| 38    | <i>Shuteria vestita</i> Wight & Arn.                                           | 0.01 |
| 38    | <i>Sohmaea teres</i> (Wall. ex Benth.) H.Ohashi & K.Ohashi                     | 0.01 |
| 38    | <i>Tephrosia vestita</i> Vogel                                                 | 0.01 |
| 38    | <i>Uraria cordifolia</i> Wall.                                                 | 0.01 |
| 38    | <i>Uraria rotundata</i> Craib                                                  | 0.01 |
| 38    | <i>Uraria rufescens</i> (DC.) Schindl.                                         | 0.01 |
| 38    | <i>Vigna dalzelliana</i> (Kuntze) Verdc.                                       | 0.01 |
| 38    | <i>Zornia diphylla</i> (L.) Pers.                                              | 0.01 |

Species that are used in National List of Essential Medicines (Development of national list of essential drugs subcommittee, 2020) mark with \*

**Table S8** The species with high level use values (UV) and their popularity for treating disorders evaluated by fidelity level (FL).

| UV   | Species                                              | Disorders          | FL(%) |
|------|------------------------------------------------------|--------------------|-------|
| 1.30 | <i>Biancaea sappan</i> (L.) Tod.                     | blood nourishment  | 13.6  |
|      |                                                      | health maintenance | 8.6   |
|      |                                                      | muscle pain        | 5.0   |
| 1.14 | <i>Mimosa pudica</i> L.                              | kidney stone       | 7.2   |
|      |                                                      | fever              | 6.1   |
|      |                                                      | health maintenance | 5.8   |
| 0.93 | <i>Senna siamea</i> (Lam.) H.S.Irwin & Barneby       | insomnia           | 7.2   |
|      |                                                      | laxative           | 5.1   |
|      |                                                      | health maintenance | 4.7   |
| 0.91 | <i>Senegalia rugata</i> (Lam.) Britton & Rose        | muscle pain        | 6.1   |
|      |                                                      | fever              | 5.6   |
|      |                                                      | phlegm             | 5.6   |
|      |                                                      | post-partum care   | 5.6   |
|      |                                                      | laxative           | 4.6   |
| 0.78 | <i>Tamarindus indica</i> L.                          | laxative           | 11.2  |
|      |                                                      | cough              | 5.4   |
|      |                                                      | wound              | 4.9   |
| 0.73 | <i>Senna alata</i> (L.) Roxb.                        | dermatophytosis    | 15.4  |
|      |                                                      | laxative           | 14.9  |
|      |                                                      | constipation       | 6.5   |
| 0.72 | <i>Cassia fistula</i> L.                             | laxative           | 15.2  |
|      |                                                      | constipation       | 6.4   |
|      |                                                      | fever              | 6.4   |
|      |                                                      | post-partum care   | 4.4   |
| 0.48 | <i>Brachypterum scandens</i> (Roxb.) Miq.            | health maintenance | 12.5  |
|      |                                                      | muscle pain        | 11.2  |
|      |                                                      | joint pain         | 5.9   |
| 0.48 | <i>Senna tora</i> (L.) Roxb.                         | fever              | 15.7  |
|      |                                                      | dermatophytosis    | 6.5   |
|      |                                                      | insomnia           | 6.5   |
|      |                                                      | laxative           | 6.5   |
|      |                                                      | health maintenance | 5.6   |
| 0.46 | <i>Tadehagi triquetrum</i> (L.) H.Ohashi             | anthelmintic       | 7.3   |
|      |                                                      | diarrhea           | 7.3   |
|      |                                                      | muscle pain        | 7.3   |
|      |                                                      | health maintenance | 6.5   |
|      |                                                      | diuretic           | 5.6   |
|      |                                                      | kidney stone       | 5.6   |
| 0.44 | <i>Albizia myriophylla</i> Benth.                    | health maintenance | 12.6  |
|      |                                                      | cough              | 6.8   |
|      |                                                      | sore throat        | 6.8   |
|      |                                                      | thirst quenching   | 6.8   |
|      |                                                      | phlegm             | 5.8   |
| 0.33 | <i>Senna garrettiana</i> (Craib) H.S.Irwin & Barneby | laxative           | 7.9   |
|      |                                                      | blood nourishment  | 6.6   |
|      |                                                      | health maintenance | 6.6   |
|      |                                                      | blood purification | 5.3   |
|      |                                                      | insomnia           | 5.3   |
| 0.32 | <i>Clitoria ternatea</i> L.                          | hair nourishment   | 15.5  |
|      |                                                      | eye tonic          | 11.3  |

| UV   | Species                             | Disorders          | FL(%) |
|------|-------------------------------------|--------------------|-------|
| 0.32 | <i>Pterocarpus macrocarpus</i> Kurz | diuretic           | 8.5   |
|      |                                     | laxative           | 8.5   |
|      |                                     | diarrhea           | 6.3   |
|      |                                     | toothache          | 6.3   |
|      |                                     | wound              | 6.3   |
| 0.29 | <i>Senna occidentalis</i> (L.) Link | fever              | 10.0  |
|      |                                     | health maintenance | 10.0  |
|      |                                     | antidote           | 8.3   |
|      |                                     | diuretic           | 8.3   |
|      |                                     | abdominal pain     | 6.7   |

**Table S9** Species with high potential to be used in public herbal medicine with their medicinal uses.

| Ranks | Scientific name                  | Vernacular name                                                                                              | Part used                                                                                      | Medicinal uses (use categories and disorders)                                                                                                                                                                                                                                                                                                                                                                                                                                                                                                                                                                                                                                                                                                                                                                                                                                                                                                                                                                                                                                                                                                                                                                                                                                                                                                                                                                                                                                                                                                                                                                                                                                                                                                                                                                                                                                                                                                                                                                                                                                                                                                                                        | UV   |
|-------|----------------------------------|--------------------------------------------------------------------------------------------------------------|------------------------------------------------------------------------------------------------|--------------------------------------------------------------------------------------------------------------------------------------------------------------------------------------------------------------------------------------------------------------------------------------------------------------------------------------------------------------------------------------------------------------------------------------------------------------------------------------------------------------------------------------------------------------------------------------------------------------------------------------------------------------------------------------------------------------------------------------------------------------------------------------------------------------------------------------------------------------------------------------------------------------------------------------------------------------------------------------------------------------------------------------------------------------------------------------------------------------------------------------------------------------------------------------------------------------------------------------------------------------------------------------------------------------------------------------------------------------------------------------------------------------------------------------------------------------------------------------------------------------------------------------------------------------------------------------------------------------------------------------------------------------------------------------------------------------------------------------------------------------------------------------------------------------------------------------------------------------------------------------------------------------------------------------------------------------------------------------------------------------------------------------------------------------------------------------------------------------------------------------------------------------------------------------|------|
| 1     | <i>Biancaea sappan</i> (L.) Tod. | Fang (Thai)<br>Ngai (Pwo)                                                                                    | bark<br>entire plant<br>inflorescences<br>infructescences<br>leaves<br>roots<br>seeds<br>stems | <p><b>blood, blood forming organs and immune mechanism:</b> anemia, blood nourishment, blood purification, polycythemia</p> <p><b>cardiovascular:</b> hemorrhoids, heart disease, heart nourishment, hypertension, stimulate blood circulation</p> <p><b>digestive:</b> abdominal pain, bile nourishment, constipation, diarrhea, flatulence, food poisoning, gastritis, IBD (inflammatory bowel disease), indigestion, jaundice, laxative, liver cancer, mouth polyp, mouth ulcer, vomiting</p> <p><b>endocrine/metabolic and nutritional:</b> appetite stimulant, beriberi, diabetes, gout, hyperlipidemia, malnutrition</p> <p><b>eye:</b> bleary-eyed</p> <p><b>female genital:</b> haemagogue, hernia (women), hypermenorrhoea, menstrual cycle adjustment, menstrual pain, menstrual purification, menstruation absent/scanty, menstruation fever, menstruation irregular, prolapsed uterus, women blood nourishment, women sexual tonic</p> <p><b>general and unspecified:</b> allergy, antidote, blister, body heat balance, bruise, cancer, chest pain, chlamydia, colic, common cold, epistaxis, fainting, fatigue, fever, internal bruise, menopause, tonic, tuberculosis, venereal disease, wound</p> <p><b>man genital:</b> hernia (man)</p> <p><b>musculoskeletal:</b> back pain, bone disease, bone pain, joint pain, lumbago, muscle pain, muscle relaxant, rheumatoid arthritis, tendinitis, tendon pain</p> <p><b>neurological:</b> brain nourishment, car sick, convulsion, dizziness, headache, meningitis, paralysis, paresis, tongue paralysis</p> <p><b>pregnancy, childbearing, family planning:</b> acceleration of lochia discharge, amniotic fluid elimination, lactation stimulant, post-partum anxiety, post-partum care, post-partum haemagogue, post-partum muscle relaxant</p> <p><b>psychological:</b> chronic alcohol abuse, insanity, insomnia</p> <p><b>respiratory:</b> asthma, bronchitis, congestion, cough, lung abscess, lung disease, phlegm, pneumonia, sore throat, thirst quenching, thirsty</p> <p><b>skin:</b> itching, pruritus, psoriasis, rash</p> <p><b>urological:</b> anuria, kidney disease, kidney stones, urinary stones</p> | 1.30 |
| 2     | <i>Mimosa pudica</i> L.          | Ji yob (Tai Yuan)<br>Toi Hoob (Tai Yuan)<br>Nor wi mae (Karen)<br>Mai ya rab (Thai)<br>Yaa pan yod (Tai yai) | entire plant<br>inflorescences<br>infructescences<br>leaves<br>roots<br>stems                  | <p><b>blood, blood forming organs and immune mechanism:</b> blood nourishment, blood purification, HIV-infection/aids</p> <p><b>cardiovascular:</b> hemorrhoids, hypertension, oedema</p> <p><b>digestive:</b> abdominal pain, constipation, diarrhea, flatulence, gastritis, IBD (inflammatory bowel disease), indigestion, jaundice, laxative, mouth ulcer,</p>                                                                                                                                                                                                                                                                                                                                                                                                                                                                                                                                                                                                                                                                                                                                                                                                                                                                                                                                                                                                                                                                                                                                                                                                                                                                                                                                                                                                                                                                                                                                                                                                                                                                                                                                                                                                                    | 1.14 |

| Ranks | Scientific name                                | Vernacular name                         | Part used                                                                             | Medicinal uses (use categories and disorders)                                                                                                                                                                                                                                                                                                                                                                                                                                                                                                                                                                                                                                                                                                                                                                                                                                                                                                                                                                                                                                                                                                                                                                                                                                                  | UV   |
|-------|------------------------------------------------|-----------------------------------------|---------------------------------------------------------------------------------------|------------------------------------------------------------------------------------------------------------------------------------------------------------------------------------------------------------------------------------------------------------------------------------------------------------------------------------------------------------------------------------------------------------------------------------------------------------------------------------------------------------------------------------------------------------------------------------------------------------------------------------------------------------------------------------------------------------------------------------------------------------------------------------------------------------------------------------------------------------------------------------------------------------------------------------------------------------------------------------------------------------------------------------------------------------------------------------------------------------------------------------------------------------------------------------------------------------------------------------------------------------------------------------------------|------|
|       |                                                |                                         |                                                                                       | vomiting, peptic ulcer, dysentery, liver dysfunction, hernia, ulcerative colitis, gastric nourishment<br><b>endocrine/metabolic and nutritional:</b> diabetes, gout, malnutrition, goiter, cholesterol-lowering<br><b>eye:</b> bleary-eyed, eye tonic, eye pain, swollen eye<br><b>female genital:</b> haemagogue, menstrual pain, oophoritis, emmenagogue<br><b>general and unspecified:</b> antidote, blister, bruise, cancer, common cold, epistaxis, fainting, fever, tonic, wound, malaria, herbicide poisoning, gonorrhea, relaxant, measles, chronic wounds, pus wound, chickenpox, elixir<br><b>musculoskeletal:</b> back pain, bone disease, joint pain, lumbago, muscle pain, muscle relaxant, bone fracture, knee pain <b>neurological:</b> convulsion, dizziness, headache, sedative<br>pregnancy, childbearing, family planning: lactation stimulant, post-partum anxiety, post-partum care, labor induction<br>psychological: insomnia, insomnia (children), neurosis<br>respiratory: asthma, bronchitis, cough, phlegm, pneumonitis<br>skin: pruritus, psoriasis, rash, urticaria, boil, herpes simplex, herpes zoster, erysipelas<br>urological: anuria, kidney disease, kidney stones, diuretic, dark color urine, dysuria, UTI (urinary tract infection), kidney dysfunction |      |
| 3     | <i>Senna siamea</i> (Lam.) H.S.Irwin & Barneby | Khi lek (Thai)<br>Pak gee dee (Tai Yai) | bark<br>entire plant<br>inflorescences<br>infructescences<br>leaves<br>roots<br>stems | <b>blood, blood forming organs and immune mechanism:</b> blood nourishment, blood purification, lymphatic system nourishment, blood dysfunction, poor lymph disorder<br><b>cardiovascular:</b> hemorrhoids, hypertension, stimulate blood circulation, oedema<br><b>digestive:</b> abdominal pain, bile nourishment, constipation, diarrhea, jaundice, laxative, mouth ulcer, dysentery, anthelmintic, colon cancer, purgative, strengthen teeth<br><b>endocrine/metabolic and nutritional:</b> appetite stimulant, beriberi, diabetes, gout, marasmus<br><b>eye:</b> bleary-eyed<br><b>female genital:</b> menstrual cycle adjustment, menstrual purification, emmenagogue, uterus dysfunction, cervicitis, uterus nourishment<br><b>general and unspecified:</b> antidote, bruise, cancer, colic, fever, tonic, tuberculosis, venereal disease, malaria, measles, elixir, hangover, balance body system, meningococcal disease, stimulate sweating<br><b>male genital:</b> BPH (benign prostatic hyperplasia)<br><b>musculoskeletal:</b> back pain, joint pain, lumbago, muscle pain                                                                                                                                                                                                         | 0.93 |

| Ranks | Scientific name                               | Vernacular name                                                                                      | Part used                                                                                      | Medicinal uses (use categories and disorders)                                                                                                                                                                                                                                                                                                                                                                                                                                                                                                                                                                                                                                                                                                                                                                                                                                                                                                                                                                                                                                                                                                                                                                                                                                                                                                                                                                                                                                                                                                            | UV   |
|-------|-----------------------------------------------|------------------------------------------------------------------------------------------------------|------------------------------------------------------------------------------------------------|----------------------------------------------------------------------------------------------------------------------------------------------------------------------------------------------------------------------------------------------------------------------------------------------------------------------------------------------------------------------------------------------------------------------------------------------------------------------------------------------------------------------------------------------------------------------------------------------------------------------------------------------------------------------------------------------------------------------------------------------------------------------------------------------------------------------------------------------------------------------------------------------------------------------------------------------------------------------------------------------------------------------------------------------------------------------------------------------------------------------------------------------------------------------------------------------------------------------------------------------------------------------------------------------------------------------------------------------------------------------------------------------------------------------------------------------------------------------------------------------------------------------------------------------------------|------|
|       |                                               |                                                                                                      |                                                                                                | <p>muscle relaxant, tendinitis, tendon pain, knee pain, leg pain, shoulder pain, neck pain, bone nourishment, tendon dysfunction, tendon purification, ameloblastoma, tendon nourishment, plantar fasciitis</p> <p><b>neurological:</b> brain nourishment, dizziness, paralysis, paresis, numbness, herniated nucleus pulposus, migraine</p> <p>pregnancy, childbearing, family planning: post-partum care, post-partum haemagogue</p> <p><b>psychological:</b> insomnia, aphrodisiac</p> <p><b>respiratory:</b> asthma, cough, lung abscess, lung disease, phlegm, hemoptysis</p> <p><b>skin:</b> itching, psoriasis, boil, herpes simplex, athlete's foot, dermatophytosis</p> <p><b>urological:</b> anuria, kidney disease, kidney stone, urinary stones, diuretic, kidney dysfunction, kidney nourishment, dialysis</p>                                                                                                                                                                                                                                                                                                                                                                                                                                                                                                                                                                                                                                                                                                                              |      |
| 4     | <i>Senegalia rugata</i> (Lam.) Britton & Rose | Som poi (Thai)<br>Som khon (Tai Yai)                                                                 | bark<br>entire plant<br>inflorescences<br>infructescences<br>leaves<br>roots<br>seeds<br>stems | <p><b>blood, blood forming organs and immune mechanism:</b> blood nourishment, blood purification, cardiovascular, hypertension, stimulate blood circulation</p> <p><b>digestive:</b> abdominal pain, constipation, diarrhea, food poisoning, laxative, vomiting, dysentery, bilharzia, mumps, sialaporia, intestinal cleanse, colon cleanse</p> <p><b>endocrine/metabolic and nutritional:</b> appetite stimulant, diabetes, gout, SLE (systemic lupus erythematosus)</p> <p><b>eye:</b> bleary-eyed, eye tonic, eye pain, eye disease, conjunctivitis</p> <p><b>female genital:</b> haemagogue, menstrual pain, menstrual purification, menstruation absent/scanty, emmenagogue</p> <p><b>general and unspecified:</b> antidote, body heat balance, cancer, common cold, fever, tonic, wound, malaria, chickenpox, hangover, pain, sweat induction, hyperhidrosis, typhoid, stop bleeding</p> <p><b>musculoskeletal:</b> joint pain, lumbago, muscle pain, muscle relaxant, tendon dysfunction, sprain, tendon relaxant</p> <p><b>neurological:</b> headache, paralysis</p> <p>pregnancy, childbearing, family planning: post-partum care</p> <p><b>psychological:</b> insomnia</p> <p><b>respiratory:</b> asthma, cough, phlegm, running nose, tight chest, nasal polyp</p> <p><b>skin:</b> itching, rash, boil, athlete's foot, dermatophytosis, anti-dandruff, skin disease, hair dysfunction, catfish poison, scorpion sting, tinea capitis, hair nourishment, dermatosis, skin inflammation</p> <p><b>urological:</b> kidney stones, diuretic</p> | 0.91 |
| 5     | <i>Tamarindus indica</i> L.                   | Ma kham (Thai)<br>Ba kham (Tai Yuan)<br>Sae mor klae (Karen)<br>Jue kua chue (Hmong)<br>La loi (Lua) | bark<br>inflorescences<br>infructescences<br>leaves<br>roots                                   | <p><b>blood, blood forming organs and immune mechanism:</b> blood nourishment, blood purification</p> <p><b>cardiovascular:</b> hemorrhoids, hypertension, stimulate blood circulation</p>                                                                                                                                                                                                                                                                                                                                                                                                                                                                                                                                                                                                                                                                                                                                                                                                                                                                                                                                                                                                                                                                                                                                                                                                                                                                                                                                                               | 0.78 |

| Ranks | Scientific name               | Vernacular name                                                                         | Part used                                                                                      | Medicinal uses (use categories and disorders)                                                                                                                                                                                                                                                                                                                                                                                                                                                                                                                                                                                                                                                                                                                                                                                                                                                                                                                                                                                                                                                                                                                                                                                                                                                                                    | UV   |
|-------|-------------------------------|-----------------------------------------------------------------------------------------|------------------------------------------------------------------------------------------------|----------------------------------------------------------------------------------------------------------------------------------------------------------------------------------------------------------------------------------------------------------------------------------------------------------------------------------------------------------------------------------------------------------------------------------------------------------------------------------------------------------------------------------------------------------------------------------------------------------------------------------------------------------------------------------------------------------------------------------------------------------------------------------------------------------------------------------------------------------------------------------------------------------------------------------------------------------------------------------------------------------------------------------------------------------------------------------------------------------------------------------------------------------------------------------------------------------------------------------------------------------------------------------------------------------------------------------|------|
|       |                               |                                                                                         | seeds<br>stems                                                                                 | <b>digestive:</b> abdominal pain, constipation, diarrhea, flatulence, indigestion, laxative, mouth ulcer, dysentery, anthelmintic, purgative, bilharzia, colon cleanse, GERD (gastroesophageal reflux disease), liver disease<br><b>endocrine/metabolic and nutritional:</b> appetite stimulant, diabetes, malnutrition, weight loss<br><b>eye:</b> bleary-eyed, eye disease<br><b>female genital:</b> tubo-ovarian abscess<br><b>general and unspecified:</b> antidote, blister, colic, common cold, fever, tonic, venereal disease, wound, malaria, chronic wounds, pus wound, hangover, meningococcal disease, stimulate sweating, typhoid, burn, infection, mushroom poisoning<br><b>musculoskeletal:</b> back pain, lumbago, muscle pain, muscle relaxant, neurological, dizziness, paralysis, epilepsy<br><b>pregnancy, childbearing, family planning:</b> amniotic fluid elimination, lactation stimulant, post-partum anxiety, post-partum care, morning sickness<br><b>psychological:</b> insanity<br><b>respiratory:</b> congestion, cough, phlegm, sore throat, thirst quenching<br><b>skin:</b> itching, pruritus, rash, urticaria, boil, herpes simplex, herpes zoster, athlete's foot, rash (children), dry skin, freckles, hyperpigmentation<br><b>urological:</b> anuria, kidney stone, urinary stones, diuretic |      |
| 6     | <i>Senna alata</i> (L.) Roxb. | Chum hed ted (Thai)<br>Ya la mer (Karen)<br>Lab muean luang (Tai Yuan)<br>Jum hed (Lua) | bark<br>entire plant<br>inflorescences<br>infructescences<br>leaves<br>roots<br>seeds<br>stems | <b>blood, blood forming organs and immune mechanism:</b> blood nourishment, lymph purification<br><b>cardiovascular:</b> hemorrhoids, heart nourishment, hypertension<br><b>digestive:</b> constipation, diarrhea, flatulence, food poisoning, laxative, mouth ulcer, peptic ulcer, anthelmintic, colon cancer, purgative, GERD (gastroesophageal reflux disease), toothache<br><b>endocrine/metabolic and nutritional:</b> hyperlipidemia, malnutrition, weight loss, malnutrition (children), dyslipidemia, hyperglycemia<br><b>general and unspecified:</b> antidote, blister, colic, fever, tonic, wound, elixir, flu-like syndrome<br><b>musculoskeletal:</b> back pain, joint pain, lumbago, muscle relaxant, tendinitis, neurological, paralysis, numbness<br><b>pregnancy, childbearing, family planning:</b> post-partum care, post-partum haemagogue<br><b>psychological:</b> insomnia<br><b>respiratory:</b> asthma, cough, lung disease, phlegm, nasal polyp<br><b>skin:</b> itching, pruritus, psoriasis, rash, boil, dermatophytosis, skin disease, hair nourishment, dermatosis, leprosy, insect bite/sting, scabies, acne<br><b>urological:</b> diuretic, cystitis                                                                                                                                               | 0.73 |

| Ranks | Scientific name                           | Vernacular name                                                                                 | Part used                                                                      | Medicinal uses (use categories and disorders)                                                                                                                                                                                                                                                                                                                                                                                                                                                                                                                                                                                                                                                                                                                                                                                                                                                                                                                                                                                                                                                                                                                                                                                                                                                                                                                                                                                                        | UV   |
|-------|-------------------------------------------|-------------------------------------------------------------------------------------------------|--------------------------------------------------------------------------------|------------------------------------------------------------------------------------------------------------------------------------------------------------------------------------------------------------------------------------------------------------------------------------------------------------------------------------------------------------------------------------------------------------------------------------------------------------------------------------------------------------------------------------------------------------------------------------------------------------------------------------------------------------------------------------------------------------------------------------------------------------------------------------------------------------------------------------------------------------------------------------------------------------------------------------------------------------------------------------------------------------------------------------------------------------------------------------------------------------------------------------------------------------------------------------------------------------------------------------------------------------------------------------------------------------------------------------------------------------------------------------------------------------------------------------------------------|------|
| 7     | <i>Cassia fistula</i> L.                  | Rat cha phruek (Thai)<br>Koon (Tai Lue, Tai Yuan, Karen)<br>Lom lang (Tai Lue, Tai Yuan, Karen) | bark<br>inflorescences<br>infructescences<br>leaves<br>roots<br>seeds<br>stems | <b>cardiovascular:</b> hemorrhoids, heart disease, hypertension, stimulate blood, circulation, heart dysfunction<br><b>digestive:</b> abdominal pain, bile nourishment, constipation, diarrhea, flatulence, gastritis, jaundice, laxative, vomiting, anthelmintic, purgative, strengthen teeth, bilharzia, toothache, carminative, hepatoprotective, rectal bleeding, gingivitis, bile purification<br><b>endocrine/metabolic and nutritional:</b> appetite stimulant, gout, malnutrition<br><b>eye:</b> eye tonic<br><b>female genital:</b> menstruation absent/scanty<br><b>general and unspecified:</b> allergy, antidote, bruise, chest pain, colic, fever, menopause, tonic, venereal disease, wound, malaria, chronic wounds, pus wound, balance body system, meningococcal disease, flu-like syndrome, drowsiness<br>musculoskeletal: bone pain, joint pain, muscle pain, muscle relaxant, tendinitis, tendon pain, knee pain, leg pain, tendon dysfunction, tendon purification, tendon nourishment<br><b>neurological:</b> convulsion, dizziness, paralysis, paresis<br>pregnancy, childbearing, family planning: post-partum anxiety, post-partum care, labor induction, abortion induced, retention of placenta<br><b>psychological:</b> narcolepsy (children)<br><b>respiratory:</b> cough, phlegm, thirst quenching<br><b>skin:</b> psoriasis, herpes simplex, dermatophytosis, yaws<br><b>urological:</b> kidney stone, urinary stones | 0.72 |
| 8     | <i>Brachypterum scandens</i> (Roxb.) Miq. | Tao wan praeng (Thai)                                                                           | entire plant<br>leaves<br>roots<br>stems                                       | <b>blood, blood forming organs and immune mechanism:</b> blood nourishment<br><b>cardiovascular:</b> hemorrhoids, hypertension, stimulate blood circulation<br><b>digestive:</b> abdominal pain, constipation, flatulence, IBD (inflammatory bowel disease), laxative, mouth ulcer, bilharzia<br><b>endocrine/metabolic and nutritional:</b> appetite stimulant, beriberi, malnutrition<br><b>female genital:</b> haemagogue, emmenagogue<br><b>general and unspecified:</b> antidote, common cold, fever, tonic, elixir, pain, inflammation<br><b>musculoskeletal:</b> back pain, bone pain, joint pain, lumbago, muscle pain, muscle relaxant, tendinitis, tendon pain, bone fracture, knee pain, tendon dysfunction, tendon nourishment, tendon relaxant<br><b>neurological:</b> headache, paralysis, numbness, herniated nucleus pulposus<br>pregnancy, childbearing, family planning: post-partum care<br><b>respiratory:</b> asthma, cough, phlegm<br><b>urological:</b> kidney disease, kidney stones, urinary stones, diuretic, UTI (urinary tract infection), kidney dysfunction, kidney nourishment, dialysis                                                                                                                                                                                                                                                                                                                              | 0.48 |

| Ranks | Scientific name                          | Vernacular name                                                        | Part used                                                                                                             | Medicinal uses (use categories and disorders)                                                                                                                                                                                                                                                                                                                                                                                                                                                                                                                                                                                                                                                                                                                                                                                                                                                                                                        | UV   |
|-------|------------------------------------------|------------------------------------------------------------------------|-----------------------------------------------------------------------------------------------------------------------|------------------------------------------------------------------------------------------------------------------------------------------------------------------------------------------------------------------------------------------------------------------------------------------------------------------------------------------------------------------------------------------------------------------------------------------------------------------------------------------------------------------------------------------------------------------------------------------------------------------------------------------------------------------------------------------------------------------------------------------------------------------------------------------------------------------------------------------------------------------------------------------------------------------------------------------------------|------|
| 9     | <i>Senna tora</i> (L.) Roxb.             | Chum hed thai (Thai)<br>Lab muean noi (Tai Yuan)<br>Ta si khla (Karen) | entire plant<br>inflorescences<br>infructescences<br>leaves<br>roots<br>seeds<br>stems<br>unspecified aerial<br>parts | <b>cardiovascular:</b> hemorrhoids, heart nourishment, hypertension<br><b>digestive:</b> abdominal pain, constipation, flatulence, food poisoning, IBD (inflammatory bowel disease), laxative, mouth ulcer, vomiting, anthelmintic, purgative, liver disease, encopresis, hepatitis, cirrhosis<br><b>endocrine/metabolic and nutritional:</b> appetite stimulant, diabetes<br><b>eye:</b> bleary-eyed, conjunctivitis<br><b>general and unspecified:</b> bruise, colic, common cold, fever, tonic, venereal disease, wound<br><b>musculoskeletal:</b> joint pain, muscle pain<br><b>neurological:</b> convulsion, headache, paralysis, nerve nourishment<br><b>pregnancy, childbearing, family planning:</b> post-partum care<br><b>psychological:</b> insanity, insomnia<br><b>respiratory:</b> cough, thirst quenching<br><b>skin:</b> psoriasis, dermatophytosis, skin disease, dermatosis, scabies<br><b>urological:</b> kidney stones, diuretic | 0.48 |
| 10    | <i>Tadehagi triquetrum</i> (L.) H.Ohashi | Khao moa nok (Thai)<br>Yaa koe khew (Tai Yuan)<br>Nor jor bi (Karen)   | entire plant<br>inflorescences<br>leaves<br>roots<br>stems                                                            | <b>cardiovascular:</b> hemorrhoids<br><b>digestive:</b> abdominal pain, diarrhea, jaundice, peptic ulcer, anthelmintic, purgative, liver disease<br><b>endocrine/metabolic and nutritional:</b> appetite stimulant, diabetes<br><b>general and unspecified:</b> antidote, bruise, cancer, common cold, fever, tonic, tuberculosis, wound, malaria, rotten wound<br><b>musculoskeletal:</b> back pain, lumbago, muscle pain, muscle relaxant, leg pain<br><b>neurological:</b> dizziness, headache<br>pregnancy, childbearing, family planning: post-partum care<br><b>respiratory:</b> asthma, cough, pneumonia<br><b>skin:</b> boil, skin disease<br><b>urological:</b> anuria, kidney stones, urinary stones, diuretic, dark color urine, kidney nourishment                                                                                                                                                                                       | 0.46 |
| 11    | <i>Albizia myriophylla</i> Benth.        | Cha em paa (Thai)<br>Pho su po (karen)<br>Som poi waan (Tai Yuan)      | bark<br>inflorescences<br>infructescences<br>leaves<br>roots<br>stems                                                 | <b>blood, blood forming organs and immune mechanism:</b> blood nourishment<br><b>cardiovascular:</b> hemorrhoids, heart nourishment, hypertension, stimulate blood circulation<br><b>digestive:</b> diarrhea, flatulence, gastritis, indigestion, jaundice, mouth ulcer, emetic, liver nourishment<br><b>endocrine/metabolic and nutritional:</b> appetite stimulant, diabetes, gout, hyperlipidemia<br><b>female genital:</b> emmenagogue<br><b>general and unspecified:</b> antidote, body heat balance, cancer, epistaxis, fatigue, fever, tonic, wound, malaria<br><b>male genital:</b> prostate nourishment<br><b>musculoskeletal:</b> back pain, lumbago, muscle pain, muscle relaxant                                                                                                                                                                                                                                                         | 0.44 |

| Ranks | Scientific name                                      | Vernacular name                                                 | Part used                                                                                                       | Medicinal uses (use categories and disorders)                                                                                                                                                                                                                                                                                                                                                                                                                                                                                                                                                                                                                                                                                                                                                                                                                                                                                                                                                                                                                   | UV   |
|-------|------------------------------------------------------|-----------------------------------------------------------------|-----------------------------------------------------------------------------------------------------------------|-----------------------------------------------------------------------------------------------------------------------------------------------------------------------------------------------------------------------------------------------------------------------------------------------------------------------------------------------------------------------------------------------------------------------------------------------------------------------------------------------------------------------------------------------------------------------------------------------------------------------------------------------------------------------------------------------------------------------------------------------------------------------------------------------------------------------------------------------------------------------------------------------------------------------------------------------------------------------------------------------------------------------------------------------------------------|------|
|       |                                                      |                                                                 |                                                                                                                 | <b>neurological:</b> dizziness, headache, paralysis<br><b>respiratory:</b> cough, phlegm, sore throat, thirst quenching, influenza, lung nourishment, respiratory disease, bronchodilators<br><b>skin:</b> rash, boil, herpes simplex, skin disease, skin nourishment, smallpox<br><b>urological:</b> kidney nourishment                                                                                                                                                                                                                                                                                                                                                                                                                                                                                                                                                                                                                                                                                                                                        |      |
| 12    | <i>Senna garrettiana</i> (Craib) H.S.Irwin & Barneby | Sa mae san (Thai)<br>Mak muean (Lua)<br>Khi lek phae (Tai Yuan) | bark<br>entire plant<br>inflorescences<br>leaves<br>roots<br>stems                                              | <b>blood, blood forming organs and immune mechanism:</b> blood nourishment, blood purification, poor lymph disorder, leukemia<br><b>cardiovascular:</b> hemorrhoids, hypertension, stimulate blood circulation, oedema, digestive, abdominal pain, laxative, liver dysfunction, anthelmintic, liver disease, IBS (irritable bowel syndrome), intestinal pain<br><b>endocrine/metabolic and nutritional:</b> diabetes<br><b>female genital:</b> haemagogue, menstruation absent/scanty<br><b>general and unspecified:</b> body heat balance, fainting, fever, tonic, wound, malaria, elixir, balance body system<br><b>musculoskeletal:</b> joint pain, muscle pain, tendon pain, knee pain, tendon, dysfunction, tendon nourishment<br><b>neurological:</b> paralysis, paresis<br>pregnancy, childbearing, family planning: post-partum care<br><b>psychological:</b> insomnia<br><b>respiratory:</b> phlegm<br><b>skin:</b> pruritus, psoriasis, herpes zoster, dermatophytosis<br><b>urological:</b> anuria, diuretic, kidney dysfunction, kidney nourishment | 0.33 |
| 13    | <i>Clitoria ternatea</i> L.                          | An chan (Thai)<br>Din yor (Tai Yai)                             | entire plant<br>inflorescences<br>leaves<br>roots<br>seeds<br>unspecified parts                                 | <b>cardiovascular:</b> hypertension, stimulate blood circulation<br><b>digestive:</b> laxative, strengthen teeth, toothache<br><b>endocrine/metabolic and nutritional:</b> diabetes, gout<br><b>eye:</b> bleary-eyed, eye tonic, eye pain, eye discharge, eye inflammation<br><b>general and unspecified:</b> bruise, tonic, pus wound, neurological, dizziness, headache<br><b>respiratory:</b> asthma, thirst quenching<br><b>skin:</b> pruritus, anti-dandruff, hair nourishment, insect bite/sting, hair loss<br><b>urological:</b> anuria, diuretic                                                                                                                                                                                                                                                                                                                                                                                                                                                                                                        | 0.32 |
| 13    | <i>Pterocarpus macrocarpus</i> Kurz                  | Pra duu (Thai)<br>Koe loe (Karen)<br>Mai duu (Tai Yuan)         | bark<br>exudates<br>galls<br>inflorescences<br>infructescences<br>leaves<br>roots<br>stems<br>unspecified parts | <b>blood, blood forming organs and immune mechanism:</b> anemia, blood nourishment<br><b>cardiovascular:</b> hemorrhoids, stimulate blood circulation, heart dysfunction<br><b>digestive:</b> diarrhea, vomiting, dysentery, strengthen teeth, toothache<br><b>female genital:</b> menstruation fever<br><b>general and unspecified:</b> antidote, colic, epistaxis, fever, menopause, tonic, wound, pus wound, stop bleeding, foot and mouth disease<br><b>musculoskeletal:</b> muscle pain, muscle relaxant<br><b>neurological:</b> headache, paralysis, epilepsy                                                                                                                                                                                                                                                                                                                                                                                                                                                                                             | 0.32 |

| Ranks | Scientific name                     | Vernacular name                                                                                   | Part used                                                                      | Medicinal uses (use categories and disorders)                                                                                                                                                                                                                                                                                                                                                                                                                                                                                                                                                                                                   | UV   |
|-------|-------------------------------------|---------------------------------------------------------------------------------------------------|--------------------------------------------------------------------------------|-------------------------------------------------------------------------------------------------------------------------------------------------------------------------------------------------------------------------------------------------------------------------------------------------------------------------------------------------------------------------------------------------------------------------------------------------------------------------------------------------------------------------------------------------------------------------------------------------------------------------------------------------|------|
|       |                                     |                                                                                                   |                                                                                | <b>pregnancy, childbearing, family planning:</b> post-partum care<br><b>respiratory:</b> asthma, cough, phlegm<br><b>skin:</b> pruritus, rash, boil, athlete's foot<br><b>urological:</b> diuretic, dysuria                                                                                                                                                                                                                                                                                                                                                                                                                                     |      |
| 14    | <i>Senna occidentalis</i> (L.) Link | Chum hed lek (Thai)<br>Mak chad (Lua)<br>Phak hed, Lab muean noi (Tai Yuan)<br>Phak jid (Tai Yai) | bark<br>entire plant<br>leaves<br>roots<br>seeds<br>stems<br>unspecified parts | <b>digestive:</b> abdominal pain, constipation, diarrhea, flatulence, vomiting, peptic ulcer, anthelmintic, food poisoning (children)<br><b>endocrine/metabolic and nutritional:</b> appetite stimulant<br><b>general and unspecified:</b> antidote, blister, body heat balance, cancer, fever, tonic, malaria, feel feverish<br><b>musculoskeletal:</b> back pain, joint pain, lumbago, muscle pain, muscle relaxant, sprain<br><b>neurological:</b> brain nourishment, epilepsy, nerve nourishment<br><b>psychological:</b> insomnia, neurosis<br><b>respiratory:</b> cough, phlegm<br><b>skin:</b> rash, boil<br><b>urological:</b> diuretic | 0.29 |
